# Supplementary material
Source: PubMed Central journal article supplement (PMC4215052)
Supplement: amiajnl-2014-002708-s1.pdf [file amiajnl-2014-002708-s1.pdf]

**Appendix Table A1. Comparison of Respondents and Non-Respondents (2008 AHA IT Supplement Survey)**

|                            | Population  | Respondents | Non-Respondents | P-value |
|----------------------------|-------------|-------------|-----------------|---------|
| <b>Total Beds</b>          |             |             |                 |         |
| 0-99                       | 2249 (49%)  | 1278 (46%)  | 971 (52%)       | <.001   |
| 100-399                    | 1935 (41%)  | 1206 (43%)  | 728 (40%)       | <.001   |
| 400+                       | 448 (10%)   | 310 (11%)   | 138 (8%)        | <.001   |
| <b>Ownership</b>           |             |             |                 |         |
| Public                     | 1115 (24%)  | 675 (24%)   | 439 (24%)       | <.001   |
| Private, Non-Profit        | 2759 (60%)  | 1772 (64%)  | 987 (54%)       | <.001   |
| Private, For-Profit        | 758 (16%)   | 347 (12%)   | 411 (22%)       | <.001   |
| <b>Member of a System</b>  |             |             |                 |         |
| Yes                        | 2506 (54%)  | 1489 (53%)  | 1017 (55%)      | 0.173   |
| No                         | 2126 (46%)  | 1305 (47%)  | 820 (45%)       | 0.173   |
| <b>Member of a Network</b> |             |             |                 |         |
| Yes                        | 1432 (33%)  | 999 (36%)   | 433 (24%)       | <.001   |
| No                         | 3200 (67%)  | 1,795 (64%) | 1,404 (76%)     | <.001   |
| <b>Location</b>            |             |             |                 |         |
| Urban                      | 2606 (56%)  | 1586 (57%)  | 1020 (56%)      | 0.406   |
| Non-Urban                  | 2025 (44%)  | 1208 (43%)  | 817 (44%)       | 0.406   |
| <b>Teaching</b>            |             |             |                 |         |
| Major or Minor             | 784 (17%)   | 525 (19%)   | 259 (14%)       | <.001   |
| Non-Teaching               | 3,839 (83%) | 2269 (81%)  | 1578 (86%)      | <.001   |

**Appendix Table A2. Stage 1 Meaningful Use Criteria and Associated AHA IT Supplement Survey Measures**

| Stage 1 MU Category                                     | Stage 1 MU Criteria                                                                                                                                                                                                                                                  | 2008 IT Supplement Question:<br>Does your hospital have a computerized system that allows for:   | 2008 IT Supplement Response Required to Meet MU Criteria |
|---------------------------------------------------------|----------------------------------------------------------------------------------------------------------------------------------------------------------------------------------------------------------------------------------------------------------------------|--------------------------------------------------------------------------------------------------|----------------------------------------------------------|
| Patient Gender, Race, Ethnicity, and Date-of-Birth      | More than 50% of all unique patients seen by the EP or admitted to the eligible hospital's or CAH's inpatient or emergency department (POS 21 or 23) have demographics recorded as structured data                                                                   | Patient Demographics                                                                             | Full Implementation in at least one Unit                 |
| Patient Problem Lists                                   | More than 80% of all unique patients seen by the EP or admitted to the eligible hospital's or CAH's inpatient or emergency department (POS 21 or 23) have at least one entry or an indication that no problems are known for the patient recorded as structured data | Patient Problem Lists                                                                            | Full Implementation in at least one Unit                 |
| Patient Medication Lists                                | More than 80% of all unique patents admitted to the eligible hospital have at least one entry (or an indication that the patient is not currently prescribed any medication) recorded as structured data                                                             | Patient Medication Lists                                                                         | Full Implementation in at least one Unit                 |
| CPOE                                                    | More than 30% of unique patients with at least one medication in their medication list seen by the EP or admitted to the eligible hospital's or CAH's inpatient or emergency department (POS 21 or 23) have at least one medication order entered using CPOE         | CPOE for Medications                                                                             | Full Implementation in at least one Unit                 |
| Electronic Copy of Discharge Instructions               | More than 50% of all patients of the EP or the inpatient or emergency departments of the eligible hospital or CAH (POS 21 or 23) who request an electronic copy of their health information are provided it                                                          | Discharge Summaries                                                                              | Full Implementation in at least one Unit                 |
| Clinical Decision Support                               | Implement one clinical decision support rule                                                                                                                                                                                                                         | CDS for guidelines, reminders, allergies, drug interactions, lab interactions, or dosing support | Full Implementation in at least one Unit                 |
| Implement drug-drug and drug-allergy interaction checks | The EP/eligible hospital/CAH has enabled this functionality for the entire EHR reporting period                                                                                                                                                                      | Drug-drug and drug-allergy interaction checking                                                  | Full Implementation in at least one Unit                 |

**Appendix Table A3. Average Homogeneity, Adoption Rate, and Rank by Function Category: Differences by Hospital Size**

|                        | Average Rank          |                    |                   | Differences in Average Rank                  |                    |                    |
|------------------------|-----------------------|--------------------|-------------------|----------------------------------------------|--------------------|--------------------|
|                        | Large<br>(n=306)      | Medium<br>(n=1211) | Small<br>(n=1281) | Large v.<br>Small                            | Large v.<br>Medium | Medium v.<br>Small |
| Clinical Documentation | 14                    | 12                 | 12                | 2                                            | 2                  | 0                  |
| Results                | 5                     | 6                  | 8                 | -3                                           | -1                 | -2                 |
| CPOE                   | 23                    | 25                 | 23                | 0                                            | -2                 | 2                  |
| Barcode                | 19                    | 16                 | 17                | 2                                            | 3                  | -1                 |
| Decision Support       | 15                    | 16                 | 15                | 0                                            | -1                 | 1                  |
|                        | Average Adoption Rate |                    |                   | Percent Differences in Average Adoption Rate |                    |                    |
|                        | Large                 | Medium             | Small             | Large v.<br>Small                            | Large v.<br>Medium | Medium v.<br>Small |
| Clinical Documentation | 0.67                  | 0.64               | 0.43              | 55.81                                        | 4.69               | 48.83              |
| Results                | 0.89                  | 0.81               | 0.54              | 64.81                                        | 9.88               | 50                 |
| CPOE                   | 0.48                  | 0.29               | 0.23              | 108.69                                       | 65.55              | 26.09              |
| Barcode                | 0.56                  | 0.52               | 0.32              | 75                                           | 7.69               | 62.5               |
| Decision Support       | 0.54                  | 0.54               | 0.35              | 54.29                                        | 0                  | 54.3               |
| <b>All</b>             | 0.66                  | 0.57               | 0.38              | 73.68                                        | 15.79              | 50                 |
|                        | Average Homogeneity   |                    |                   | Percent Differences in Average Homogeneity   |                    |                    |
|                        | Large                 | Medium             | Small             | Large v.<br>Small                            | Large v.<br>Medium | Medium v.<br>Small |
| Clinical Documentation | 0.38                  | 0.41               | 0.47              | -23.68                                       | -7.90              | -14.63             |
| Results                | 0.46                  | 0.46               | 0.54              | -17.39                                       | 0                  | -17.39             |
| CPOE                   | 0.42                  | 0.41               | 0.42              | 0.00                                         | 0.24               | -0.24              |
| Barcode                | 0.21                  | 0.25               | 0.32              | -0.52                                        | -19.05             | -28                |
| Decision Support       | 0.38                  | 0.43               | 0.47              | -23.68                                       | -13.16             | -9.30              |
| <b>All</b>             | 0.34                  | 0.38               | 0.50              | -27.80                                       | -5.59              | -23.52             |

**Appendix Table A4. Detailed Homogeneity and Adoption Rate by Size**

| Small                               |               |              | Medium                              |               |              | Large                               |               |              |
|-------------------------------------|---------------|--------------|-------------------------------------|---------------|--------------|-------------------------------------|---------------|--------------|
| Function                            | Adoption Rate | Homogeneity  | Function                            | Adoption Rate | Homogeneity  | Function                            | Adoption Rate | Homogeneity  |
| <b>Patient Demographics</b>         | <b>0.763</b>  | <b>0.703</b> | Radiology Reports                   | 0.949         | 0.740        | Radiology Reports                   | 0.981         | 0.743        |
| Radiology Reports                   | 0.728         | 0.740        | Lab Reports                         | 0.944         | 0.615        | Radiology Images                    | 0.971         | 0.593        |
| Lab Reports                         | 0.721         | 0.766        | <b>Patient Demographics</b>         | <b>0.925</b>  | <b>0.592</b> | <b>Patient Demographics</b>         | <b>0.968</b>  | <b>0.584</b> |
| Radiology Images                    | 0.677         | 0.517        | Radiology Images                    | 0.891         | 0.409        | Lab Reports                         | 0.968         | 0.455        |
| <b>Drug-Drug Interaction Alerts</b> | <b>0.490</b>  | <b>0.569</b> | Diagnostic Test Results             | 0.747         | 0.359        | Diagnostic Test Results             | 0.897         | 0.457        |
| <b>Drug Allergy Alerts</b>          | <b>0.490</b>  | <b>0.570</b> | <b>Medication Lists</b>             | <b>0.745</b>  | <b>0.468</b> | <b>Drug Allergy Alerts</b>          | <b>0.781</b>  | <b>0.465</b> |
| <b>Medication Lists</b>             | <b>0.479</b>  | <b>0.552</b> | Consultant Reports                  | 0.721         | 0.362        | Diagnostic Test Images              | 0.777         | 0.297        |
| <b>Discharge Summaries</b>          | <b>0.477</b>  | <b>0.551</b> | <b>Discharge Summaries</b>          | <b>0.720</b>  | <b>0.408</b> | <b>Drug-Drug Interaction Alerts</b> | <b>0.777</b>  | <b>0.417</b> |
| Laboratory specimens barcode        | 0.454         | 0.380        | <b>Drug Allergy Alerts</b>          | 0.711         | 0.463        | <b>Medication Lists</b>             | 0.774         | 0.434        |
| Nursing Assessments                 | 0.435         | 0.549        | <b>Drug-Drug Interaction Alerts</b> | <b>0.711</b>  | <b>0.455</b> | Consultant Reports                  | 0.761         | 0.204        |
| Diagnostic Test Results             | 0.424         | 0.471        | Nursing Assessments                 | 0.696         | 0.415        | Nursing Assessments                 | 0.716         | 0.354        |
| Consultant Reports                  | 0.422         | 0.454        | Laboratory specimens barcode        | 0.667         | 0.178        | <b>Discharge Summaries</b>          | <b>0.703</b>  | <b>0.332</b> |
| <b>Drug-Lab Interaction Alerts</b>  | <b>0.382</b>  | <b>0.505</b> | Patient ID barcode                  | 0.614         | 0.264        | Laboratory specimens barcode        | 0.665         | 0.206        |
| Patient ID barcode                  | 0.360         | 0.389        | Diagnostic Test Images              | 0.576         | 0.274        | <b>Drug-Lab Interaction Alerts</b>  | <b>0.655</b>  | <b>0.303</b> |
| <b>Drug Dosing Support</b>          | <b>0.343</b>  | <b>0.472</b> | <b>Drug-Lab Interaction Alerts</b>  | <b>0.566</b>  | <b>0.406</b> | Patient ID barcode                  | 0.642         | 0.211        |
| Advanced Directives                 | 0.340         | 0.457        | Advanced Directives                 | 0.550         | 0.324        | <b>Drug Dosing Support</b>          | <b>0.632</b>  | <b>0.331</b> |
| <b>Problem Lists</b>                | <b>0.322</b>  | <b>0.508</b> | <b>Problem Lists</b>                | <b>0.538</b>  | <b>0.364</b> | Advanced Directives                 | 0.581         | 0.298        |
| Radiology Tests CPOE                | 0.280         | 0.392        | <b>Drug Dosing Support</b>          | <b>0.528</b>  | <b>0.418</b> | <b>Problem Lists</b>                | <b>0.542</b>  | <b>0.330</b> |
| Diagnostic Test Images              | 0.322         | 0.404        | Tracking pharmaceuticals barcode    | 0.417         | 0.273        | <b>Clinical Reminders</b>           | <b>0.529</b>  | <b>0.382</b> |
| Laboratory Tests CPOE               | 0.272         | 0.388        | <b>Clinical Reminders</b>           | <b>0.406</b>  | <b>0.429</b> | Nursing Orders CPOE                 | 0.510         | 0.388        |

|                                       |              |              |                                       |       |       |                                       |       |       |
|---------------------------------------|--------------|--------------|---------------------------------------|-------|-------|---------------------------------------|-------|-------|
| Tracking pharmaceuticals barcode      | 0.243        | 0.388        | Pharmaceutical administration barcode | 0.385 | 0.290 | Laboratory Tests CPOE                 | 0.500 | 0.393 |
| Nursing Orders CPOE                   | 0.237        | 0.480        | Nursing Orders CPOE                   | 0.318 | 0.403 | Radiology Tests CPOE                  | 0.500 | 0.417 |
| <b>Clinical Reminders</b>             | <b>0.228</b> | <b>0.510</b> | <b>Clinical Guidelines</b>            | 0.313 | 0.429 | Tracking pharmaceuticals barcode      | 0.474 | 0.214 |
| <b>Medications CPOE</b>               | <b>0.225</b> | <b>0.459</b> | Radiology Tests CPOE                  | 0.312 | 0.379 | <b>Medications CPOE</b>               | 0.471 | 0.432 |
| Pharmaceutical administration barcode | 0.229        | 0.407        | Laboratory Tests CPOE                 | 0.309 | 0.372 | Pharmaceutical administration barcode | 0.452 | 0.195 |
| Physician Notes                       | 0.216        | 0.433        | Physician Notes                       | 0.299 | 0.327 | Consultation Requests CPOE            | 0.442 | 0.455 |
| <b>Clinical Guidelines</b>            | <b>0.168</b> | <b>0.532</b> | <b>Medications CPOE</b>               | 0.277 | 0.432 | <b>Clinical Guidelines</b>            | 0.439 | 0.407 |
| Consultation Requests CPOE            | 0.163        | 0.553        | Consultation Requests CPOE            | 0.249 | 0.481 | Physician Notes                       | 0.416 | 0.320 |
| SCALE                                 | 0.385        | 0.494        | SCALE                                 | 0.574 | 0.379 | SCALE                                 | 0.662 | 0.344 |
| N                                     | 1281         |              | N                                     | 1206  |       | N                                     | 310   |       |

**Appendix Table A5. Detailed Homogeneity and Adoption Rate by Hospital Location**

| Rural                                 |               |             | Urban                                 |               |             |
|---------------------------------------|---------------|-------------|---------------------------------------|---------------|-------------|
| Function                              | Adoption Rate | Homogeneity | Function                              | Adoption Rate | Homogeneity |
| <b>Patient Demographics</b>           | 0.858         | 0.770       | <b>Patient Demographics</b>           | 0.952         | 0.726       |
| Radiology Reports                     | 0.749         | 0.771       | Radiology Reports                     | 0.924         | 0.764       |
| Lab Reports                           | 0.744         | 0.789       | Lab Reports                           | 0.915         | 0.687       |
| Radiology Images                      | 0.703         | 0.545       | Radiology Images                      | 0.871         | 0.508       |
| <b>Drug Allergy Alerts</b>            | 0.533         | 0.602       | Diagnostic Test Results               | 0.736         | 0.451       |
| <b>Drug-Drug Interaction Alerts</b>   | 0.533         | 0.599       | <b>Medication Lists</b>               | 0.713         | 0.521       |
| <b>Discharge Summaries</b>            | 0.516         | 0.551       | Consultant Reports                    | 0.686         | 0.386       |
| <b>Medication Lists</b>               | 0.508         | 0.552       | <b>Drug-Drug Interaction Alerts</b>   | 0.679         | 0.488       |
| Laboratory specimens barcode          | 0.498         | 0.413       | <b>Drug Allergy Alerts</b>            | 0.678         | 0.498       |
| Nursing Assessments                   | 0.475         | 0.552       | <b>Discharge Summaries</b>            | 0.672         | 0.453       |
| Consultant Reports                    | 0.451         | 0.473       | Nursing Assessments                   | 0.656         | 0.462       |
| Diagnostic Test Results               | 0.449         | 0.487       | Laboratory specimens barcode          | 0.618         | 0.237       |
| <b>Drug-Lab Interaction Alerts</b>    | 0.426         | 0.524       | Diagnostic Test Images                | 0.585         | 0.337       |
| Patient ID barcode                    | 0.411         | 0.417       | Patient ID barcode                    | 0.564         | 0.306       |
| Advanced Directives                   | 0.385         | 0.478       | <b>Drug-Lab Interaction Alerts</b>    | 0.539         | 0.421       |
| <b>Drug Dosing Support</b>            | 0.381         | 0.498       | Advanced Directives                   | 0.511         | 0.359       |
| <b>Problem Lists</b>                  | 0.360         | 0.496       | <b>Drug Dosing Support</b>            | 0.510         | 0.427       |
| Diagnostic Test Images                | 0.335         | 0.418       | <b>Problem Lists</b>                  | 0.498         | 0.414       |
| Tracking pharmaceuticals barcode      | 0.268         | 0.410       | <b>Clinical Reminders</b>             | 0.400         | 0.445       |
| Radiology Tests CPOE                  | 0.259         | 0.398       | Tracking pharmaceuticals barcode      | 0.397         | 0.292       |
| Clinical Reminders                    | 0.257         | 0.519       | Pharmaceutical administration barcode | 0.368         | 0.305       |
| Pharmaceutical administration barcode | 0.254         | 0.411       | Radiology Tests CPOE                  | 0.362         | 0.386       |
| Laboratory Tests CPOE                 | 0.253         | 0.384       | Nursing Orders CPOE                   | 0.362         | 0.421       |
| Physician Notes                       | 0.234         | 0.438       | Laboratory Tests CPOE                 | 0.357         | 0.393       |
| Nursing Orders CPOE                   | 0.224         | 0.488       | <b>Medications CPOE</b>               | 0.325         | 0.439       |
| <b>Medications CPOE</b>               | 0.207         | 0.476       | <b>Clinical Guidelines</b>            | 0.312         | 0.453       |
| <b>Clinical Guidelines</b>            | 0.195         | 0.541       | Physician Notes                       | 0.304         | 0.354       |
| Consultation Requests CPOE            | 0.154         | 0.566       | Consultation Requests CPOE            | 0.290         | 0.498       |
| SCALE                                 | 0.415         | 0.507       | SCALE                                 | 0.564         | 0.415       |
| N                                     | 1208          |             | N                                     | 1586          |             |

**Appendix Table A6. Detailed Homogeneity and Adoption Rate by Teaching Status**

| Non-Teaching                          |               |             | Teaching (Major and Minor)            |               |             |
|---------------------------------------|---------------|-------------|---------------------------------------|---------------|-------------|
| Function                              | Adoption Rate | Homogeneity | Function                              | Adoption Rate | Homogeneity |
| <b>Patient Demographics</b>           | 0.831         | 0.712       | Radiology Reports                     | 0.983         | 0.679       |
| Radiology Reports                     | 0.817         | 0.772       | Lab Reports                           | 0.968         | 0.453       |
| Lab Reports                           | 0.812         | 0.770       | Radiology Images                      | 0.960         | 0.321       |
| Radiology Images                      | 0.761         | 0.544       | <b>Patient Demographics</b>           | 0.958         | 0.553       |
| <b>Medication Lists</b>               | 0.593         | 0.562       | Diagnostic Test Results               | 0.850         | 0.411       |
| <b>Drug Allergy Alerts</b>            | 0.586         | 0.556       | <b>Medication Lists</b>               | 0.758         | 0.458       |
| <b>Discharge Summaries</b>            | 0.585         | 0.560       | <b>Drug Allergy Alerts</b>            | 0.747         | 0.468       |
| Diagnostic Test Results               | 0.580         | 0.537       | <b>Drug-Drug Interaction Alerts</b>   | 0.745         | 0.447       |
| Nursing Assessments                   | 0.557         | 0.480       | Diagnostic Test Images                | 0.718         | 0.260       |
| Consultant Reports                    | 0.551         | 0.543       | <b>Discharge Summaries</b>            | 0.712         | 0.346       |
| Laboratory specimens barcode          | 0.547         | 0.464       | Nursing Assessments                   | 0.693         | 0.352       |
| Patient ID barcode                    | 0.543         | 0.346       | Laboratory specimens barcode          | 0.663         | 0.195       |
| <b>Drug-Lab Interaction Alerts</b>    | 0.474         | 0.399       | Patient ID barcode                    | 0.600         | 0.215       |
| Advanced Directives                   | 0.469         | 0.498       | <b>Drug-Lab Interaction Alerts</b>    | 0.581         | 0.346       |
| <b>Drug Dosing Support</b>            | 0.433         | 0.448       | <b>Drug Dosing Support</b>            | 0.581         | 0.373       |
| Diagnostic Test Images                | 0.424         | 0.479       | Advanced Directives                   | 0.558         | 0.282       |
| <b>Problem Lists</b>                  | 0.421         | 0.400       | <b>Problem Lists</b>                  | 0.547         | 0.326       |
| Tracking pharmaceuticals barcode      | 0.413         | 0.485       | <b>Clinical Reminders</b>             | 0.488         | 0.406       |
| <b>Clinical Reminders</b>             | 0.324         | 0.385       | Laboratory Tests CPOE                 | 0.455         | 0.392       |
| Pharmaceutical administration barcode | 0.304         | 0.498       | Radiology Tests CPOE                  | 0.451         | 0.415       |
| Radiology Tests CPOE                  | 0.301         | 0.388       | Nursing Orders CPOE                   | 0.451         | 0.389       |
| Laboratory Tests CPOE                 | 0.287         | 0.387       | <b>Medications CPOE</b>               | 0.417         | 0.428       |
| Nursing Orders CPOE                   | 0.279         | 0.389       | Tracking pharmaceuticals barcode      | 0.417         | 0.221       |
| Physician Notes                       | 0.268         | 0.469       | Pharmaceutical administration barcode | 0.394         | 0.245       |
| <b>Medications CPOE</b>               | 0.251         | 0.404       | <b>Clinical Guidelines</b>            | 0.389         | 0.423       |
| <b>Clinical Guidelines</b>            | 0.241         | 0.462       | Consultation Requests CPOE            | 0.375         | 0.473       |
| Consultation Requests CPOE            | 0.232         | 0.508       | Physician Notes                       | 0.371         | 0.332       |
| SCALE                                 | 0.670         | 0.485       | SCALE                                 | 0.983         | 0.354       |
| N                                     | 2269          |             |                                       | 525           |             |
